# Supplementary material
Source: bioRxiv or medRxiv preprint supplement (https://medrxiv.org/highwire/filestream/94412/field_highwire_adjunct_files/0/2020.07.01.20143503-1.pdf)
Supplement: Supplementary file [file 2020.07.01.20143503-1.pdf]

## **S1 File: Supplementary Figures and Tables**

### **Heterogeneity in response to serological exposure markers of recent *Plasmodium vivax* infections in contrasting epidemiological contexts**

Jason Rosado, Michael T. White, Rhea J. Longley, Marcus Lacerda, Wuelton Monteiro, Jessica Brewster, Jetsumon Sattabongkot, Mitchel Guzman-Guzman, Alejandro Llanos-Cuentas, Joseph M. Vinetz, Dionicia Gamboa, Ivo Mueller

## Study design

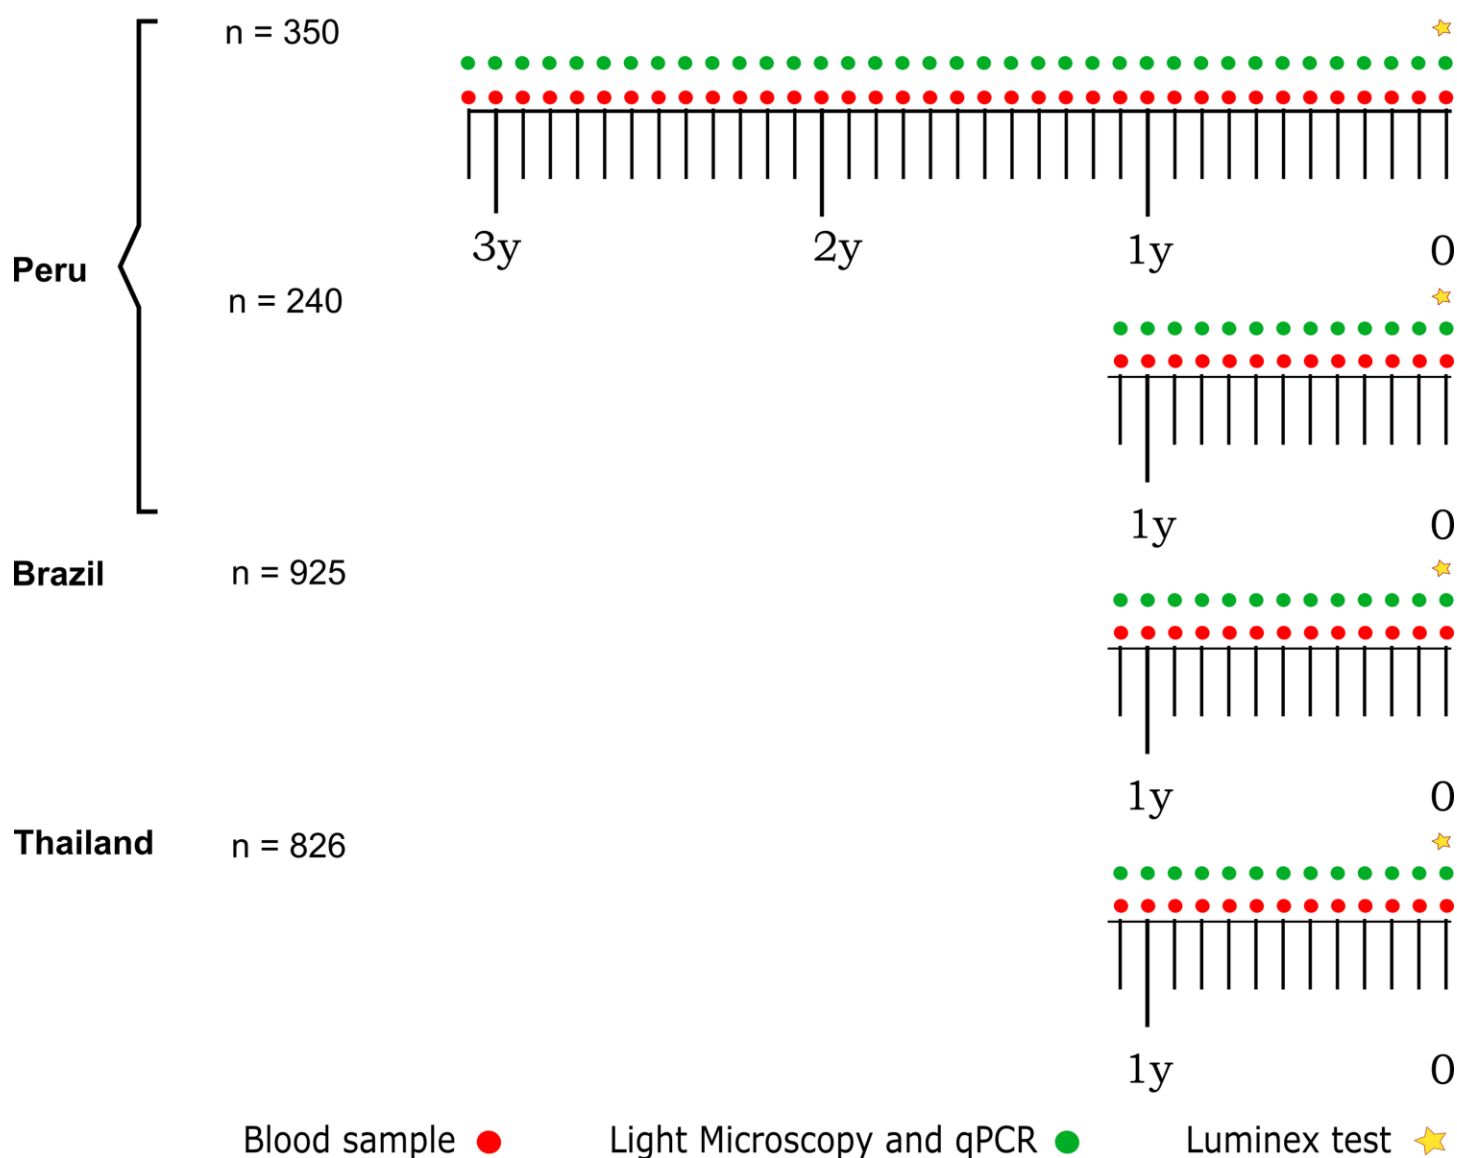

**Fig I. Study design for the retrospective analysis of 13 months of follow-up.** Five hundred ninety (590) individuals from the Peruvian cohort were included from which 350 were followed up to 37 months, and 240 individuals were followed for the last 13 months of the study. For the Brazilian (13 months) and Thailand (14 months) cohort, 925 and 826 individuals were included. In the three cohorts, a monthly blood sample was taken for diagnosis by light microscopy and qPCR. "0" denotes the last time point of following up where a serum sample was taken for Luminex assay.

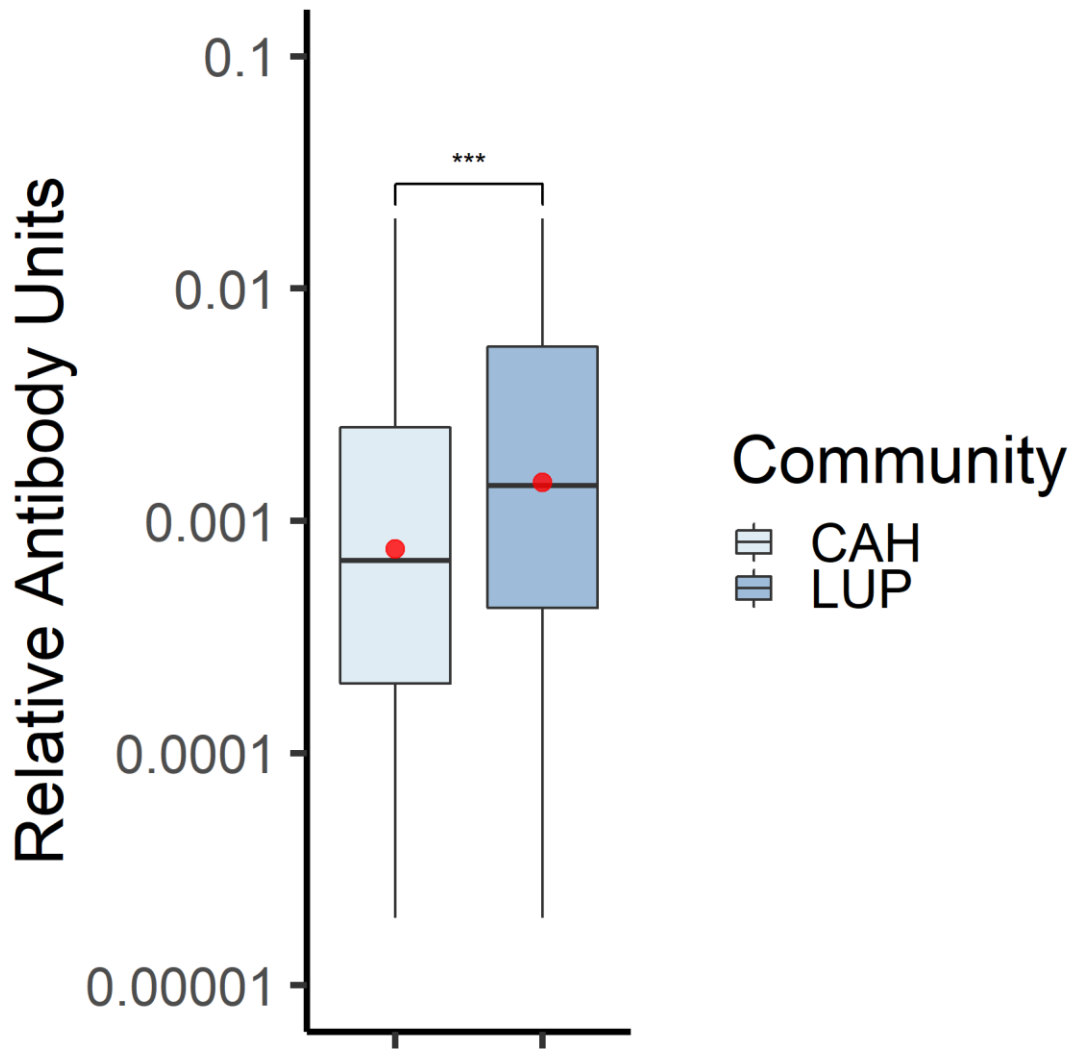

**Fig II. Distribution of antibody responses to 34 Serological markers of exposure in the Peruvian communities of Cahuide (CAH) and Lupuna (LUP).** Red dot indicates geometric mean titer (GMT) in each group. \*\*\* = significant difference between GMT of CAH and LUP,  $p < 0.001$ , t-test.

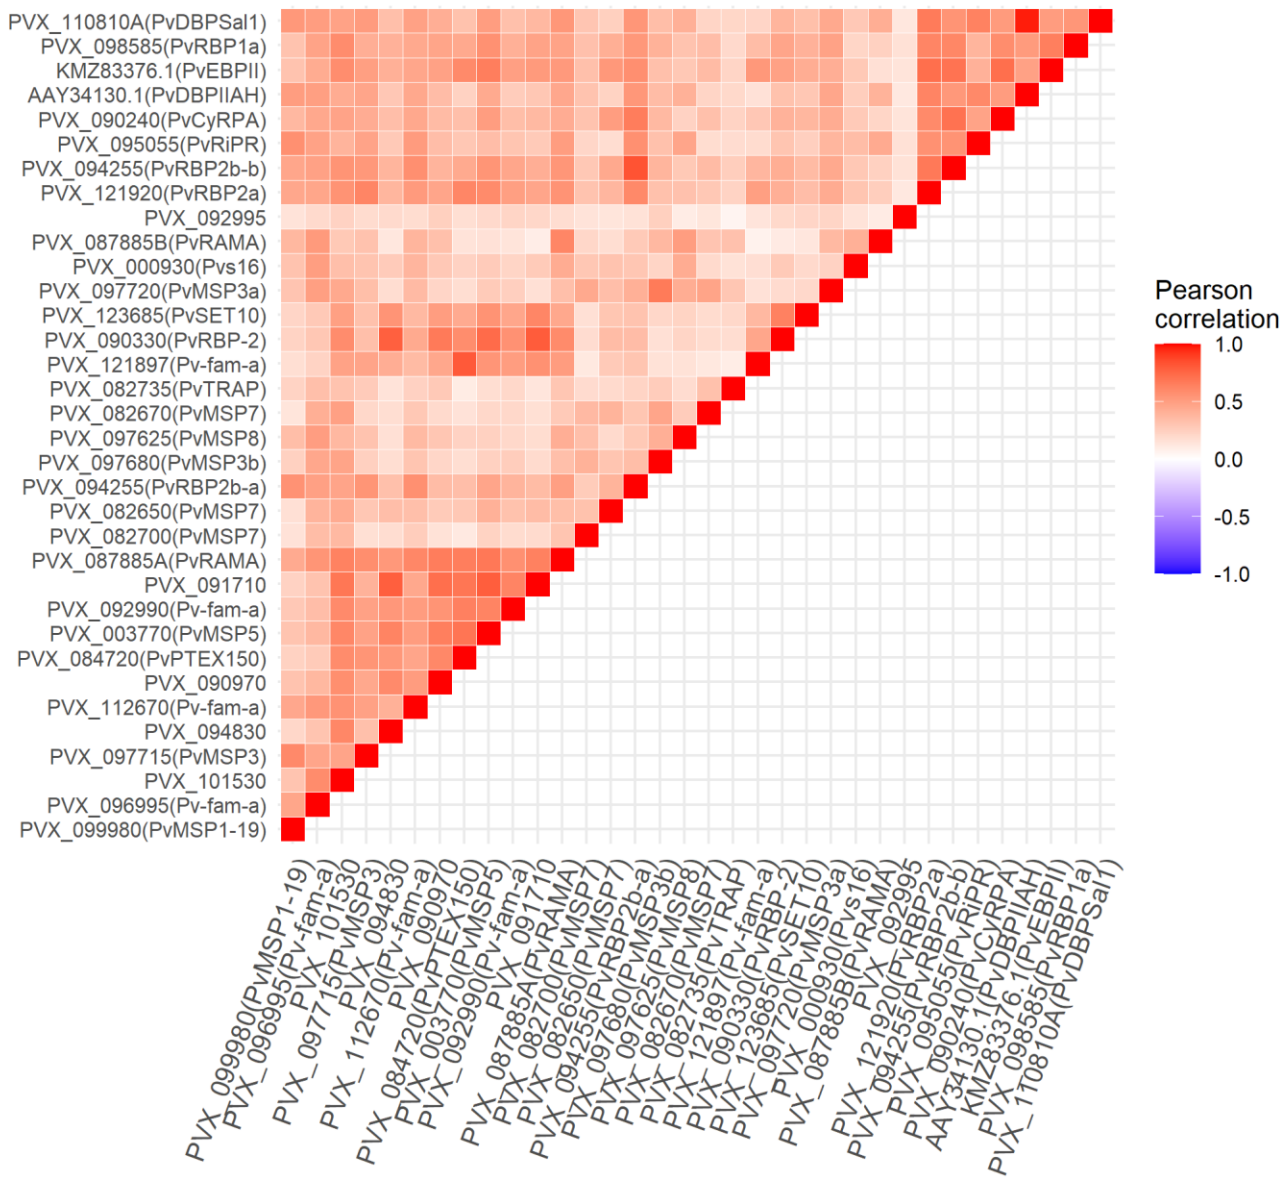

Fig III. Pearson correlation between antibody responses to 34 Serological markers of exposure in the Peruvian cohort.

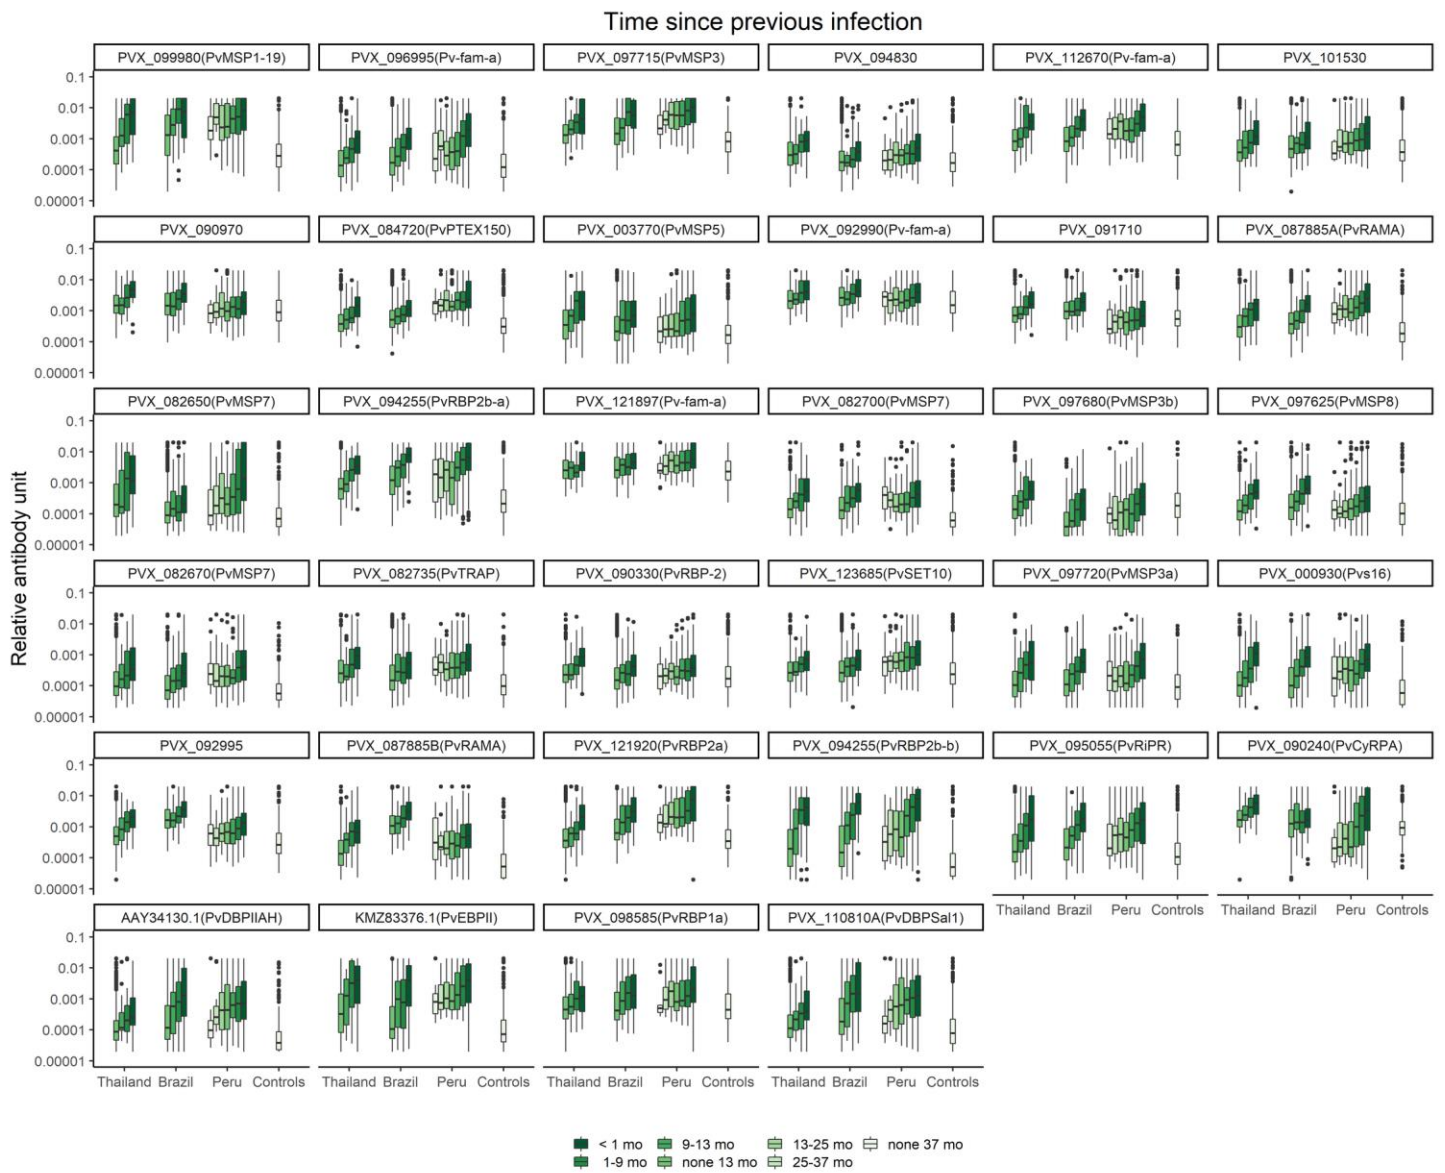

**Fig IV. Association between antibody responses to 34 *P. vivax* antigens and time since previous *P. vivax* blood-stage infection. Mo: number of months since previous infection.**

Blood stage infections

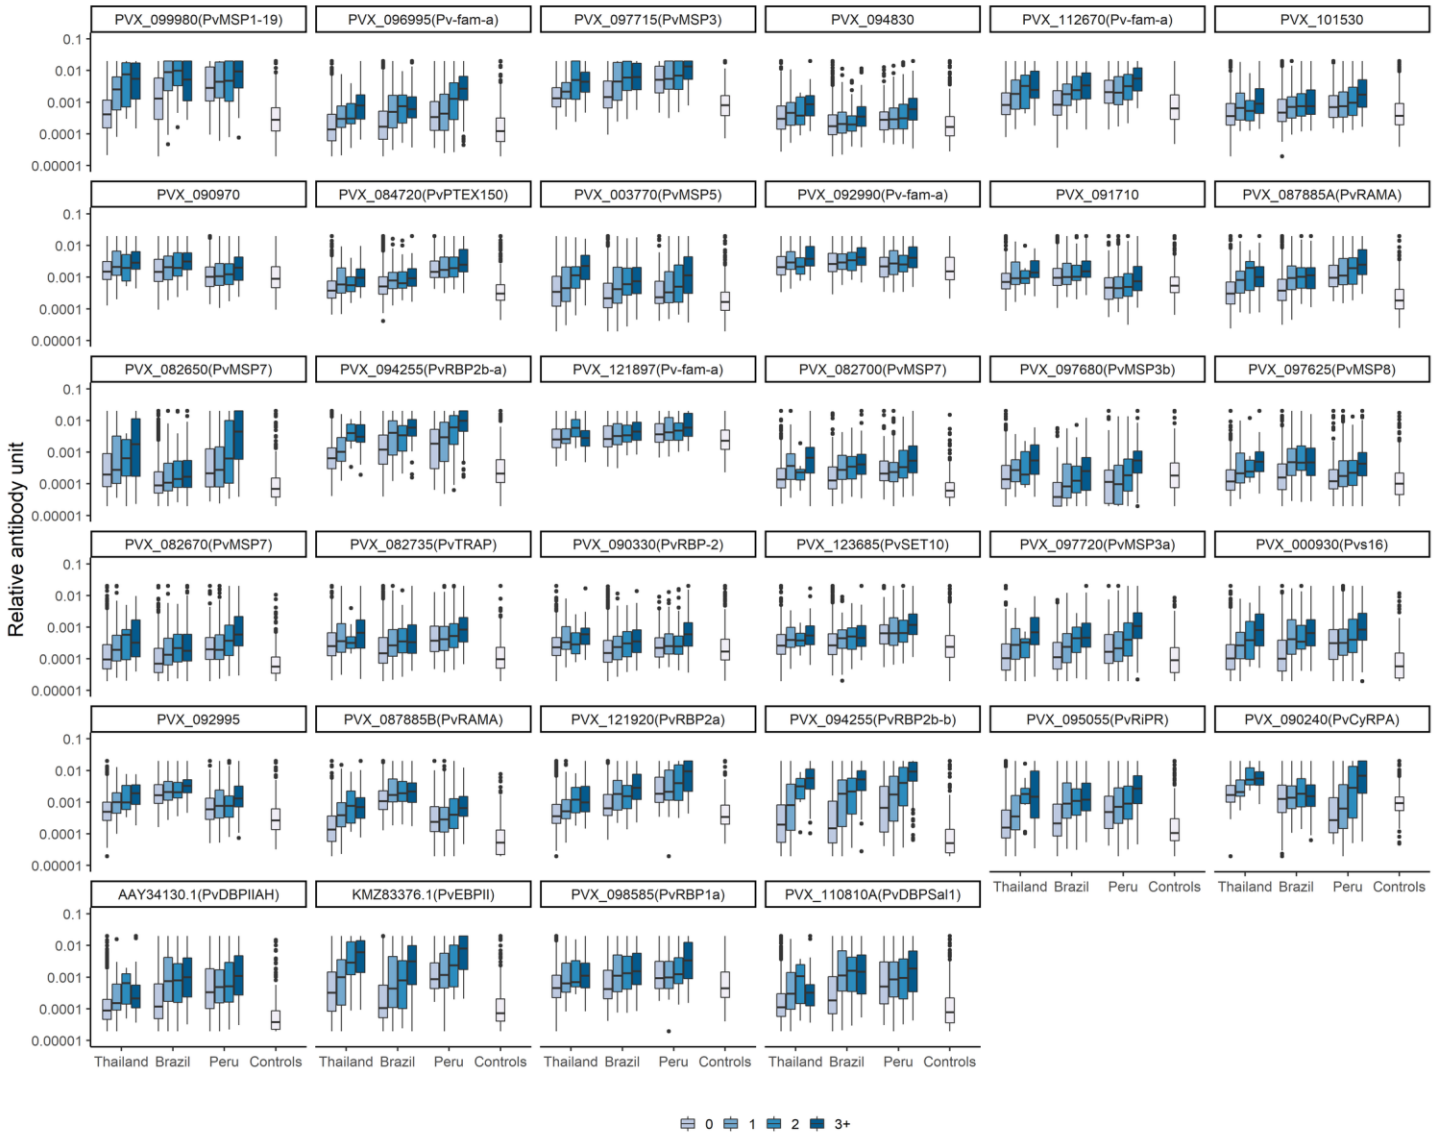

**Fig V. Association between antibody responses to 34 *P. vivax* antigens and number of blood stage infections detected by qPCR.**



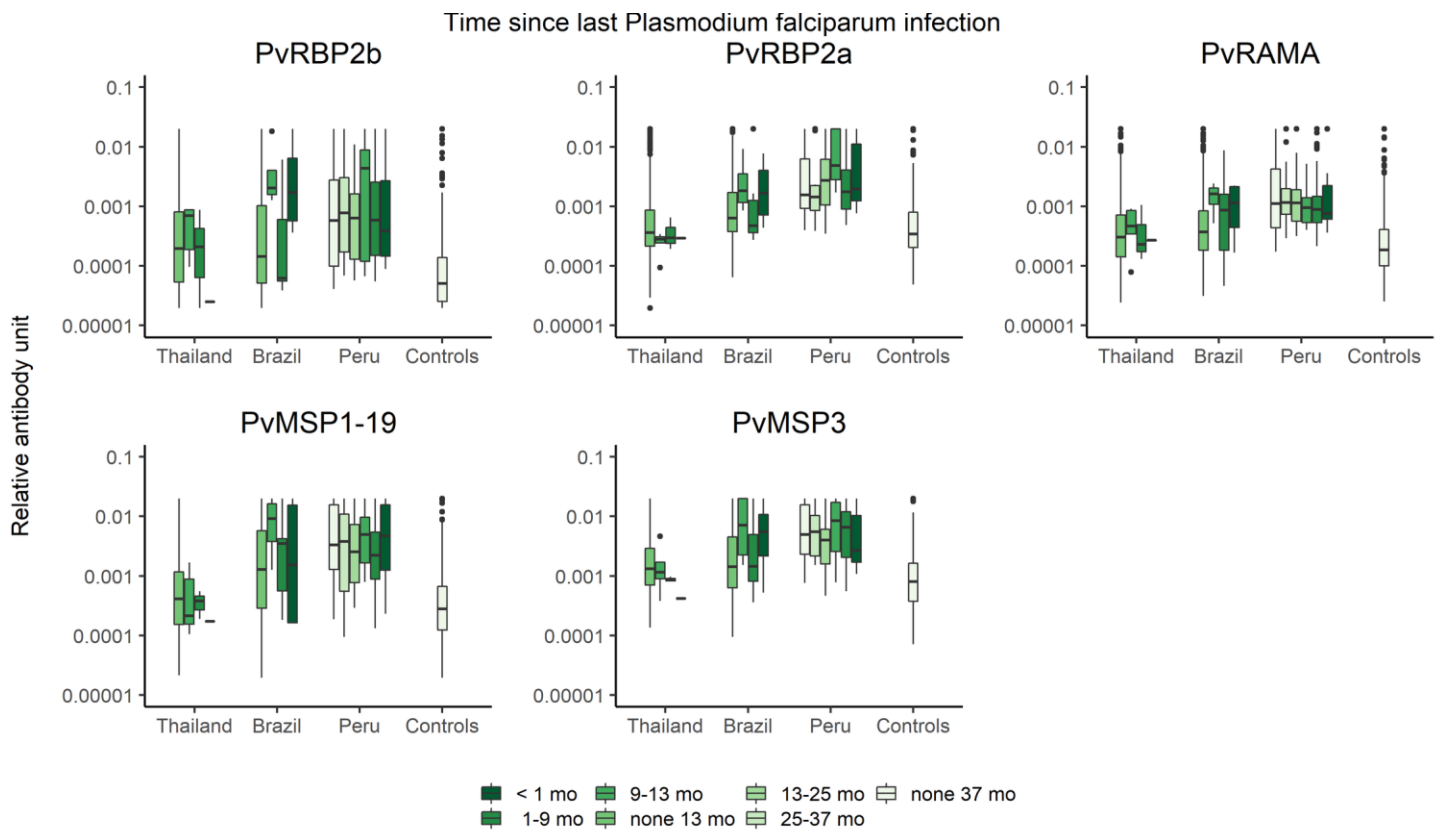

**Fig VII. Association between antibody responses to top five *P. vivax* antigens and time since last *P. falciparum* blood-stage infections.** Antibodies responses to PvrBP2b (PVX\_094255), PvrBP2 (PVX\_121920), PvrAMA (PVX\_087885), PvMSP1<sub>19</sub> (PVX\_099980) and PvMSP3 (PVX\_097715, hypothetical PvMSP3). Note that all individuals with at least one *P. vivax* infection were removed from the analysis. There were not significant differences between individuals with *P. falciparum* PCR detection in the last 9 months and people with no *P. falciparum* infection.



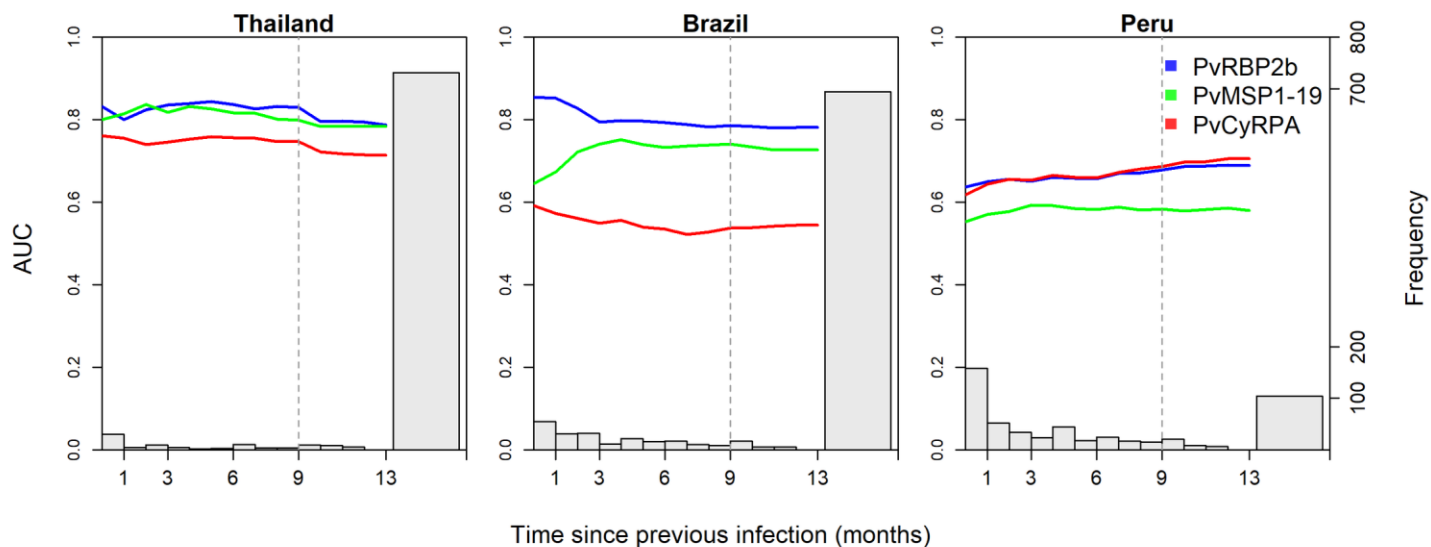

**Fig VIII. Association of diagnostic performance of antibody responses in different timeframes with the distribution of time since the previous infection.** Area under the ROC curve (AUC) values were calculated using data of single antibody responses to PVX\_094255 (PvRBP2b), PVX\_090240 (PvCyRPA) and PVX\_099980 (PvMSP1<sub>19</sub>) to detect infections in each timeframe. Grey bars indicate the frequency of time since previous *P. vivax* infection in each study site.

Table I. Association of antibody responses with current *P. vivax* infection in the Peruvian cohort.

| Antibody response | Odds ratio, 95% CI  |
|-------------------|---------------------|
| PVX_099980        | 1.27 (0.93,1.74)¥   |
| PVX_096995        | 1.64 (1.26,2.13)*** |
| PVX_101530        | 1.43 (1.04,1.98)*   |
| PVX_097715        | 1.59 (1.02,2.49)*   |
| PVX_094830        | 1.55 (1.08,2.22)*   |
| PVX_112670        | 1.99 (1.35,2.92)*** |
| PVX_090970        | 1.75 (1.18,2.59)**  |
| PVX_084720        | 1.62 (1.07,2.43)*   |
| PVX_003770        | 1.41 (1.06,1.88)*   |
| PVX_092990        | 1.73 (1.11,2.69)*   |
| PVX_091710        | 1.42 (1,2.01)¥      |
| PVX_087885        | 1.59 (1.11,2.27)*   |
| PVX_082700        | 1.27 (0.91,1.76)¥   |
| PVX_082650        | 1.38 (1.12,1.7)**   |
| PVX_094255        | 1.62 (1.2,2.18)**   |
| PVX_097680        | 1.51 (1.16,1.96)**  |
| PVX_097625        | 1.34 (1,1.79)¥      |
| PVX_082670        | 1.29 (0.98,1.71)¥   |
| PVX_082735        | 1.99 (1.42,2.79)*** |
| PVX_121897        | 1.71 (1.04,2.81)*   |
| PVX_090330        | 1.50 (1.02,2.19)*   |
| PVX_123685        | 1.48 (1.04,2.1)*    |
| PVX_097720        | 1.60 (1.22,2.08)**  |
| PVX_000930        | 1.49 (1.13,1.96)**  |
| PVX_000930        | 1.82 (1.28,2.59)**  |
| PVX_092995        | 1.24 (0.9,1.7)¥     |
| PVX_121920        | 1.71 (1.19,2.46)**  |
| PVX_094255B       | 1.79 (1.37,2.35)*** |
| PVX_095055        | 1.46 (1.12,1.89)**  |
| PVX_090240        | 1.64 (1.29,2.09)*** |
| AAY34130.1        | 1.17 (0.92,1.5)¥    |
| KMZ83376.1        | 1.43 (1.06,1.93)*   |
| PVX_098585        | 1.56 (1.14,2.14)**  |
| PVX_110810A       | 1.19 (0.93,1.53)¥   |

95% CI = 95% confidence interval. ¥ : Not significant. \*:  $p < 0.05$ , \*\*:  $p < 0.01$ , \*\*\*:  $p < 0.001$ .

**Table II. Multivariate linear regression model explaining the antibody level in the Peruvian cohort.** The model was corrected by age, community, gender, *P. vivax* infections in the last 6 months, *P. vivax* infections in the initial 7 months, clinical infections in the last 6 months, education level, time living in the community and working as a farmer.

|            | Age,<br>Log10               | Community<br>(Ref =<br>Cahuide) | Gender<br>(Ref =<br>Female) | Number of<br>qPCR +ve<br>last 6<br>months <sup>‡</sup> | Number of<br>qPCR +ve<br>initial 7<br>months <sup>¶</sup> | Number of<br>clinical <i>P.</i><br><i>vivax</i><br>episodes<br>last 6<br>months | Education (Ref = No<br>education) |                            | Time in<br>community<br>(years) | Working<br>as farmer  |
|------------|-----------------------------|---------------------------------|-----------------------------|--------------------------------------------------------|-----------------------------------------------------------|---------------------------------------------------------------------------------|-----------------------------------|----------------------------|---------------------------------|-----------------------|
|            | Coefficient<br>95% CI       | Coefficient<br>95% CI           | Coefficient<br>95% CI       | Coefficient<br>95% CI                                  | Coefficient<br>95% CI                                     | Coefficient<br>95% CI                                                           | Coefficient<br>95% CI             | Coefficient<br>95% CI      | Coefficient<br>95% CI           | Coefficient<br>95% CI |
| PVX_099980 | 0.420***<br>0.267,<br>0.572 |                                 |                             | 0.094***<br>0.055,<br>0.134                            |                                                           | 0.416**<br>0.178,<br>0.654                                                      |                                   |                            |                                 |                       |
| PVX_096995 | 0.861***<br>0.705,<br>1.017 | 0.305***<br>0.197,<br>0.414     |                             | 0.167***<br>0.126,<br>0.207                            |                                                           | 0.384**<br>0.129,<br>0.640                                                      |                                   |                            |                                 |                       |
| PVX_101530 | 0.242**<br>0.072,<br>0.413  |                                 | 0.157**<br>0.066,<br>0.247  | 0.069***<br>0.032,<br>0.106                            |                                                           |                                                                                 |                                   | 0.007**<br>0.003,<br>0.010 |                                 |                       |
| PVX_097715 | 0.336***<br>0.233,<br>0.439 | 0.096**<br>0.024,<br>0.168      |                             | 0.061***<br>0.031,<br>0.090                            |                                                           |                                                                                 |                                   |                            |                                 |                       |
| PVX_094830 | 0.374***<br>0.251,<br>0.496 | 0.175***<br>0.094,<br>0.255     | 0.122**<br>0.040,<br>0.203  | 0.060**<br>0.023,<br>0.098                             |                                                           |                                                                                 |                                   |                            |                                 |                       |
| PVX_112670 | 0.396***<br>0.277,<br>0.515 |                                 | 0.105*<br>0.023,<br>0.186   | 0.109***<br>0.076,<br>0.142                            |                                                           |                                                                                 |                                   |                            |                                 |                       |
| PVX_090970 | 0.280***<br>0.161,<br>0.398 |                                 | 0.112**<br>0.033,<br>0.191  | 0.056**<br>0.023,<br>0.088                             |                                                           |                                                                                 |                                   |                            |                                 |                       |
| PVX_084720 | 0.242***<br>0.136,<br>0.349 |                                 | 0.144***<br>0.069,<br>0.219 |                                                        | 0.040**<br>0.010,<br>0.070                                |                                                                                 |                                   |                            |                                 |                       |
| PVX_003770 | 0.705***<br>0.556,<br>0.853 | 0.219***<br>0.113,<br>0.324     |                             |                                                        | 0.073**<br>0.031,<br>0.115                                |                                                                                 |                                   |                            |                                 |                       |
| PVX_092990 | 0.257***<br>0.150,<br>0.364 |                                 |                             | 0.062***<br>0.033,<br>0.092                            |                                                           |                                                                                 |                                   |                            |                                 |                       |

|             |                             |                              |                             |                             |                             |                             |                            |
|-------------|-----------------------------|------------------------------|-----------------------------|-----------------------------|-----------------------------|-----------------------------|----------------------------|
| PVX_091710  |                             | 0.175***<br>0.089, 0<br>.262 | 0.136**<br>0.049,<br>0.223  |                             | 0.115●<br>-0.003,<br>0.232  | 0.189**<br>0.059,<br>0.320  | 0.193**<br>0.074,<br>0.312 |
| PVX_087885  | 0.320***<br>0.197,<br>0.443 | 0.125**<br>0.041,<br>0.210   | 0.145**<br>0.062,<br>0.228  | 0.074***<br>0.038,<br>0.109 |                             |                             |                            |
| PVX_082700  | 0.514***<br>0.385,<br>0.642 | 0.200***<br>0.107,<br>0.293  |                             |                             | 0.068**<br>0.024,<br>0.111  |                             |                            |
| PVX_082650  | 1.127***<br>0.950,<br>1.305 | 0.538***<br>0.411,<br>0.666  | 0.177**<br>0.060,<br>0.294  | 0.106**<br>0.046,<br>0.166  | 0.118***<br>0.068,<br>0.167 |                             |                            |
| PVX_094255A | 0.709***<br>0.556,<br>0.861 | 0.400***<br>0.297,<br>0.502  |                             | 0.138***<br>0.100,<br>0.177 | 0.505***<br>0.284,<br>0.727 |                             |                            |
| PVX_097680  | 0.659***<br>0.500,<br>0.818 | 0.234***<br>0.126,<br>0.342  | 0.202***<br>0.096,<br>0.307 | 0.177***<br>0.130,<br>0.224 |                             |                             |                            |
| PVX_097625  |                             |                              |                             | 0.099***<br>0.056,<br>0.143 |                             | 0.009***<br>0.005,<br>0.012 |                            |
| PVX_082670  | 0.515***<br>0.337,<br>0.694 | 0.204***<br>0.091,<br>0.316  | 0.156**<br>0.057,<br>0.255  | 0.095***<br>0.051,<br>0.139 |                             | 0.006**<br>0.001,<br>0.010  |                            |
| PVX_082735  | 0.505***<br>0.377,<br>0.633 |                              |                             | 0.106***<br>0.064,<br>0.149 |                             |                             |                            |
| PVX_121897  | 0.146**<br>0.056,<br>0.236  |                              | 0.130***<br>0.066,<br>0.193 | 0.042**<br>0.015,0.069      |                             |                             |                            |
| PVX_090330  | 0.403***<br>0.290,<br>0.517 | 0.145***<br>0.064,<br>0.226  | 0.143***<br>0.067,<br>0.219 |                             | 0.059**<br>0.024,<br>0.092  |                             |                            |
| PVX_123685  | 0.291***<br>0.164,<br>0.417 | 0.135**<br>0.044,<br>0.227   | 0.126**<br>0.039,<br>0.212  |                             | 0.050**<br>0.015,<br>0.085  |                             |                            |
| PVX_097720  | 0.756***<br>0.600,<br>0.912 | 0.226***<br>0.116,<br>0.335  |                             | 0.159***<br>0.114,<br>0.204 | 0.063**<br>0.020,<br>0.107  |                             |                            |
| PVX_000930  | 0.515***                    | 0.247***                     |                             | 0.112***                    |                             |                             |                            |

|             |                 |                 |                 |                 |                 |
|-------------|-----------------|-----------------|-----------------|-----------------|-----------------|
|             | 0.361,<br>0.670 | 0.138,<br>0.356 |                 | 0.068,<br>0.157 |                 |
| PVX_095055  | 0.524***        | 0.214***        |                 | 0.133***        | 0.504**         |
|             | 0.355,<br>0.693 | 0.095,<br>0.332 |                 | 0.082,<br>0.185 | 0.187,<br>0.821 |
| PVX_090240  | 1.062***        | 0.466***        |                 | 0.174***        | 0.073**         |
|             | 0.901,<br>1.222 | 0.352,<br>0.581 |                 | 0.127,<br>0.221 | 0.028,<br>0.118 |
| PVX_110810A | 0.627***        |                 |                 | 0.083**         |                 |
|             | 0.449,<br>0.805 |                 |                 | 0.029,<br>0.136 |                 |
| AAY34130.1  | 0.667***        |                 |                 | 0.080**         |                 |
|             | 0.491,<br>0.843 |                 |                 | 0.027,<br>0.134 |                 |
| KMZ83376.1  | 0.761***        | 0.268***        |                 | 0.071***        | 0.078***        |
|             | 0.624,<br>0.897 | 0.172,<br>0.363 |                 | 0.031,<br>0.111 | 0.038,<br>0.118 |
| PVX_098585  | 0.613***        | 0.129***        | 0.169***        | 0.072**         | 0.055**         |
|             | 0.482,<br>0.745 | 0.034,<br>0.223 | 0.080,<br>0.259 | 0.029,<br>0.115 | 0.014,<br>0.095 |
| PVX_121920  | 0.512***        |                 |                 | 0.094***        |                 |
|             | 0.390,<br>0.633 |                 |                 | 0.058,<br>0.129 |                 |
| PVX_094255B | 0.917***        | 0.502***        |                 | 0.194***        | 0.449***        |
|             | 0.750,<br>1.083 | 0.388,<br>0.616 |                 | 0.154,<br>0.234 | 0.204,<br>0.693 |
| PVX_087885  | 0.446***        | 0.201***        |                 | 0.074***        | 0.419**         |
|             | 0.309,<br>0.583 | 0.105,<br>0.297 |                 | 0.037,<br>0.111 | 0.159,<br>0.679 |
| PVX_092995  | 0.264***        |                 | 0.173***        | 0.093***        |                 |
|             | 0.135,<br>0.393 |                 | 0.086,<br>0.260 | 0.060,<br>0.126 |                 |

A clinical episode was defined by having a temperature of  $\geq 38.0^{\circ}\text{C}$  at the time of sample collection or having fever in the past 48 hours and parasite density  $>500$  parasites/uL.  $\ddagger$ : Number of *P. vivax* positive qPCR results within the last six months of following up. Concurrent *P. vivax* infections were included in the variable Number of *P. vivax* positive qPCR results within the last six months of following up.  $\S$ : Number of *P. vivax* positive qPCR results the initial seven months of following up. 95% CI: 95% confidence interval. \*  $p < 0.05$ ; \*\*  $p < 0.01$ ; \*\*\*  $p < 0.001$ .

**Table III. Epidemiologic characteristics of the study sites and participants.**

| Characteristics                                                     | Thailand<br>n = 826 | Brazil<br>n = 925     | Peru<br>n = 590      |
|---------------------------------------------------------------------|---------------------|-----------------------|----------------------|
| Age (median, range)                                                 | 24.0 (1.00 - 78.0)  | 25.37 (0.01 - 102.64) | 26.0 ( 3.80 - 85.57) |
| <15 years old (%)                                                   | 40.68               | 37.84                 | 35.93                |
| 15-39 years old (%)                                                 | 32.32               | 30.05                 | 32.54                |
| ≥40 years old (%)                                                   | 27.00               | 32.11                 | 31.53                |
| Female sex (%)                                                      | 54.6                | 50.59                 | 58.30                |
| Forest-related occupation (≥18 years old) (%) <sup>‡</sup>          |                     |                       |                      |
| Farmer/Fishing <sup>a,c</sup>                                       | 33.17               | 14.55                 | 38.32                |
| Infection by qPCR at D0 <sup>†</sup>                                |                     |                       |                      |
| <i>P. vivax</i> (%) <sup>a,b</sup>                                  | 3.03                | 4.22                  | 21.19                |
| <i>P. falciparum</i> (%) <sup>a,b</sup>                             | 0.24                | 0.43                  | 2.71                 |
| Months of follow-up, <i>n</i>                                       | 14                  | 13                    | 13/37 <sup>#</sup>   |
| Total clinical <i>P. vivax</i> infections, <i>n</i> (%)             |                     |                       |                      |
| 0 <sup>c,d</sup>                                                    | 801 (96.97)         | 846 (91.46)           | 562 (95.25)          |
| 1 <sup>c</sup>                                                      | 22 (2.66)           | 56 (6.05)             | 26 (4.41)            |
| ≥2 <sup>c,d</sup>                                                   | 3 (0.36)            | 23 (2.49)             | 2 (0.34)             |
| Total <i>P. vivax</i> infections by qPCR in 13 months, <i>n</i> (%) |                     |                       |                      |
| 0 <sup>a,b</sup>                                                    | 729 (88.26)         | 690 (74.59)           | 146(24.74)           |
| 1 <sup>a,b</sup>                                                    | 41 (4.96)           | 98 (10.60)            | 170 (28.81)          |
| 2 <sup>a,b</sup>                                                    | 10 (1.21)           | 54 (5.84)             | 117 (19.83)          |
| ≥3 <sup>a,b</sup>                                                   | 46 (5.57)           | 83 (8.97)             | 157 (26.61)          |
| Days since last past <i>P. vivax</i> infection, <i>n</i> (%)        |                     |                       |                      |
| < 1 month <sup>a,b</sup>                                            | 30 (3.63)           | 55 (5.95)             | 160 (27.12)          |
| 1-9 months <sup>a,b</sup>                                           | 42 (5.08)           | 149 (16.11)           | 228 (38.64)          |
| 9-13 months <sup>a,b</sup>                                          | 25 (3.03)           | 31 (3.35)             | 56 (9.49)            |
| No infection in 13 months <sup>a,b</sup>                            | 729 (88.26)         | 690 (74.59)           | 146 (24.74)          |

<sup>‡</sup> Occupation in Peru: Farmer (30.83%), fishing (1.73%), woodcutter (5.76%). <sup>#</sup>: Individuals followed for 13 months (n=240), individuals followed for 37 months (n=350). <sup>a</sup>: Significant differences between Thailand and Peru, p<0.05; <sup>b</sup>: Significant differences between Brazil and Peru, p<0.05; <sup>c</sup>: Significant differences between Thailand and Brazil, p<0.05; <sup>d</sup>: Significant differences between Brazil and Peru, p<0.05. <sup>†</sup> Prevalence includes single - and mixed-species infections.

**Table IV. Characteristic of evaluated constructs.**

| Protein ID <sup>a</sup> | Gene Annotation <sup>a</sup>                                               | AUC      |        |      |         | Combined data set | Rank |
|-------------------------|----------------------------------------------------------------------------|----------|--------|------|---------|-------------------|------|
|                         |                                                                            | Thailand | Brazil | Peru | Average |                   |      |
| PVX_094255B             | reticulocyte binding protein 2b (RBP2b)                                    | 0.83     | 0.79   | 0.68 | 0.77    | 0.80              | 1    |
| PVX_121920              | reticulocyte binding protein 2a (RBP2a)                                    | 0.69     | 0.70   | 0.61 | 0.67    | 0.77              | 2    |
| PVX_087885B             | rhoptry-associated membrane antigen, putative                              | 0.74     | 0.72   | 0.61 | 0.69    | 0.76              | 3    |
| PVX_099980              | merozoite surface protein 1 (MSP1-19)                                      | 0.80     | 0.74   | 0.58 | 0.71    | 0.76              | 4    |
| PVX_097715              | hypothetical protein                                                       | 0.72     | 0.73   | 0.59 | 0.68    | 0.76              | 5    |
| KMZ83376.1 <sup>b</sup> | erythrocyte binding protein II (PvEBPII)                                   | 0.76     | 0.72   | 0.62 | 0.70    | 0.75              | 6    |
| PVX_000930              | sexual stage antigen s16, putative                                         | 0.77     | 0.75   | 0.63 | 0.72    | 0.75              | 7    |
| PVX_094255A             | reticulocyte binding protein 2b (RBP2b)                                    | 0.79     | 0.72   | 0.66 | 0.72    | 0.75              | 8    |
| PVX_096995              | tryptophan-rich antigen (Pv-fam-a)                                         | 0.74     | 0.71   | 0.66 | 0.70    | 0.75              | 9    |
| PVX_084720              | translocon component PTEX150, putative                                     | 0.72     | 0.62   | 0.56 | 0.64    | 0.74              | 10   |
| AAV34130.1b             | Duffy binding protein (DBP, region 2, AH strain)                           | 0.71     | 0.73   | 0.58 | 0.67    | 0.74              | 11   |
| PVX_095055              | Rh5 interacting protein, putative (RIPR)                                   | 0.74     | 0.75   | 0.62 | 0.70    | 0.74              | 12   |
| PVX_112670              | unspecified product                                                        | 0.75     | 0.72   | 0.62 | 0.69    | 0.73              | 13   |
| PVX_110810A             | Duffy binding protein (DBP, region 2, Sal1 strain)                         | 0.70     | 0.73   | 0.58 | 0.67    | 0.73              | 14   |
| PVX_097720              | merozoite surface protein 3 (MSP3.10)                                      | 0.78     | 0.71   | 0.65 | 0.72    | 0.72              | 15   |
| PVX_082670              | merozoite surface protein 7 (MSP7), putative                               | 0.70     | 0.68   | 0.63 | 0.67    | 0.71              | 16   |
| PVX_082700              | merozoite surface protein 7 (MSP7.1)                                       | 0.72     | 0.70   | 0.61 | 0.68    | 0.70              | 17   |
| PVX_098585              | reticulocyte binding protein 1a (RBP1a)                                    | 0.67     | 0.67   | 0.59 | 0.64    | 0.69              | 18   |
| PVX_097625              | merozoite surface protein 8 (MSP8), putative                               | 0.76     | 0.72   | 0.63 | 0.70    | 0.68              | 19   |
| PVX_123685              | histone-lysine N-methyltransferase, H3 lysine-4 specific (SET10), putative | 0.68     | 0.61   | 0.56 | 0.62    | 0.68              | 20   |
| PVX_097680              | merozoite surface protein 3 (MSP3.3)                                       | 0.72     | 0.72   | 0.63 | 0.69    | 0.66              | 21   |
| PVX_101530              | Plasmodium exported protein, unknown function                              | 0.69     | 0.59   | 0.58 | 0.62    | 0.65              | 22   |
| PVX_082735              | thrombospondin-related anonymous protein (TRAP)                            | 0.66     | 0.63   | 0.59 | 0.63    | 0.65              | 23   |
| PVX_082650              | merozoite surface protein 7 (MSP7), putative                               | 0.69     | 0.59   | 0.64 | 0.64    | 0.65              | 24   |
| PVX_003770              | merozoite surface protein 5 (MSP5)                                         | 0.73     | 0.65   | 0.61 | 0.66    | 0.64              | 25   |
| PVX_121897              | tryptophan-rich antigen (Pv-fam-a)                                         | 0.55     | 0.57   | 0.56 | 0.56    | 0.62              | 26   |
| PVX_087885A             | rhoptry associated membrane antigen, putative                              | 0.78     | 0.66   | 0.61 | 0.68    | 0.62              | 27   |
| PVX_090330              | reticulocyte binding protein 2 precursor (PvRBP-2), putative               | 0.71     | 0.61   | 0.58 | 0.63    | 0.62              | 28   |
| PVX_092995              | tryptophan-rich antigen (Pv-fam-a)                                         | 0.77     | 0.62   | 0.60 | 0.67    | 0.61              | 29   |
| PVX_092990              | tryptophan-rich antigen (Pv-fam-a)                                         | 0.66     | 0.59   | 0.60 | 0.61    | 0.59              | 30   |
| PVX_094830              | hypothetical protein, conserved                                            | 0.69     | 0.58   | 0.58 | 0.62    | 0.59              | 31   |
| PVX_090240              | cysteine-rich protective antigen, putative (CyRPA)                         | 0.75     | 0.54   | 0.69 | 0.66    | 0.58              | 32   |

|            |                                 |      |      |      |      |      |    |
|------------|---------------------------------|------|------|------|------|------|----|
| PVX_090970 | hypothetical protein, conserved | 0.69 | 0.61 | 0.55 | 0.62 | 0.55 | 33 |
| PVX_091710 | hypothetical protein, conserved | 0.72 | 0.58 | 0.56 | 0.62 | 0.52 | 34 |

<sup>a</sup>PlasmoDB release 36 (<http://plasmodb.org/plasmo/>), <sup>b</sup>GenBank

## References

- 1 J. Hietanen, A. Chim-Ong, T. Chiramanewong, J. Gruszczyk, W. Roobsoong, W. H. Tham, J. Sattabongkot, W. Nguitragool, Gene Models, Expression Repertoire, and Immune Response of Plasmodium vivax Reticulocyte Binding Proteins. *Infect Immun* **84**, 677-685 (2015).
- 2 F. Lu, J. Li, B. Wang, Y. Cheng, D. H. Kong, L. Cui, K. S. Ha, J. Sattabongkot, T. Tsuboi, E. T. Han, Profiling the humoral immune responses to Plasmodium vivax infection and identification of candidate immunogenic rhoptry-associated membrane antigen (RAMA). *J Proteomics* **102**, 66-82 (2014).
- 3 J. Healer, J. K. Thompson, D. T. Riglar, D. W. Wilson, Y. H. Chiu, K. Miura, L. Chen, A. N. Hodder, C. A. Long, D. S. Hansen, J. Baum, A. F. Cowman, Vaccination with conserved regions of erythrocyte-binding antigens induces neutralizing antibodies against multiple strains of Plasmodium falciparum. *PLoS One* **8**, e72504 (2013).
- 4 J. L. Cole-Tobian, P. Michon, M. Biasor, J. S. Richards, J. G. Beeson, I. Mueller, C. L. King, Strain-specific duffy binding protein antibodies correlate with protection against infection with homologous compared to heterologous plasmodium vivax strains in Papua New Guinean children. *Infect Immun* **77**, 4009-4017 (2009).
- 5 C. T. Franca, M. T. White, W. Q. He, J. B. Hostetler, J. Brewster, G. Frato, I. Malhotra, J. Gruszczyk, C. Huon, E. Lin, B. Kiniboro, A. Yadava, P. Siba, M. R. Galinski, J. Healer, C. Chitnis, A. F. Cowman, E. Takashima, T. Tsuboi, W. H. Tham, R. M. Fairhurst, J. C. Rayner, C. L. King, I. Mueller, Identification of highly-protective combinations of Plasmodium vivax recombinant proteins for vaccine development. *Elife* **6**, (2017).



**Table V. Top antibody responses for classifying recent infections.**

| <b>Country</b>  | <b>Rank</b> | <b>Single antibody response model</b> | <b>AUC</b> |
|-----------------|-------------|---------------------------------------|------------|
| <b>Thailand</b> | 1           | PVX_094255B                           | 0.83       |
|                 | 2           | PVX_099980                            | 0.80       |
|                 | 3           | PVX_094255A                           | 0.79       |
|                 | 4           | PVX_097720                            | 0.78       |
|                 | 5           | PVX_087885A                           | 0.78       |
|                 | 6           | PVX_000930                            | 0.77       |
|                 | 7           | PVX_092995                            | 0.77       |
|                 | 8           | KMZ83376.1                            | 0.76       |
|                 | 9           | PVX_097625                            | 0.76       |
| <b>Brazil</b>   | 1           | PVX_094255B                           | 0.79       |
|                 | 2           | PVX_000930                            | 0.75       |
|                 | 3           | PVX_095055                            | 0.75       |
|                 | 4           | PVX_099980                            | 0.74       |
|                 | 5           | PVX_097715                            | 0.73       |
|                 | 6           | AAV34130.1                            | 0.73       |
|                 | 7           | PVX_110810A                           | 0.73       |
|                 | 8           | PVX_087885                            | 0.72       |
| <b>Peru</b>     | 1           | PVX_090240                            | 0.69       |
|                 | 2           | PVX_094255B                           | 0.68       |
|                 | 3           | PVX_096995                            | 0.66       |
|                 | 4           | PVX_094255A                           | 0.66       |
|                 | 5           | PVX_097720                            | 0.65       |
|                 | 6           | PVX_082650                            | 0.64       |
|                 | 7           | PVX_082670                            | 0.63       |
|                 | 8           | PVX_000930                            | 0.63       |
|                 | 9           | PVX_097680                            | 0.63       |

Abbreviations: AUC = Area under the ROC curve.

**Table VI. Geometric mean titer of 34 SEM across the study sites.**

| Antibody response | Negative controls |         |       | Thailand |        |       | Brazil |        |       | Peru |        |       |
|-------------------|-------------------|---------|-------|----------|--------|-------|--------|--------|-------|------|--------|-------|
|                   | GMT*              | 95% CI* |       | GMT      | 95% CI |       | GMT    | 95% CI |       | GMT  | 95% CI |       |
| PVX_099980        | 0.33              | 0.04    | 17.19 | 0.59     | 0.04   | 20.00 | 1.80   | 0.06   | 20.00 | 4.02 | 0.14   | 20.00 |
| PVX_096995        | 0.16              | 0.02    | 8.35  | 0.19     | 0.02   | 5.50  | 0.29   | 0.03   | 7.59  | 0.89 | 0.04   | 20.00 |
| PVX_101530        | 0.49              | 0.08    | 20.00 | 1.62     | 0.24   | 20.00 | 2.31   | 0.21   | 20.00 | 6.35 | 0.85   | 20.00 |
| PVX_097715        | 0.88              | 0.13    | 20.00 | 0.38     | 0.06   | 5.27  | 0.24   | 0.04   | 4.49  | 0.39 | 0.06   | 7.76  |
| PVX_094830        | 0.21              | 0.04    | 9.38  | 1.08     | 0.16   | 20.00 | 1.30   | 0.13   | 20.00 | 2.96 | 0.28   | 20.00 |
| PVX_112670        | 0.81              | 0.12    | 20.00 | 0.50     | 0.09   | 8.13  | 0.70   | 0.11   | 20.00 | 1.20 | 0.18   | 20.00 |
| PVX_090970        | 1.17              | 0.14    | 20.00 | 1.83     | 0.39   | 20.00 | 1.88   | 0.24   | 20.00 | 1.40 | 0.21   | 19.78 |
| PVX_084720        | 0.39              | 0.09    | 12.68 | 0.49     | 0.11   | 5.89  | 0.70   | 0.14   | 12.39 | 2.40 | 0.52   | 20.00 |
| PVX_003770        | 0.21              | 0.03    | 7.95  | 0.43     | 0.04   | 10.33 | 0.36   | 0.03   | 12.55 | 0.62 | 0.07   | 20.00 |
| PVX_092990        | 1.91              | 0.30    | 20.00 | 2.57     | 0.53   | 20.00 | 3.21   | 0.59   | 20.00 | 2.95 | 0.52   | 20.00 |
| PVX_091710        | 0.70              | 0.14    | 20.00 | 0.86     | 0.20   | 10.28 | 1.25   | 0.25   | 20.00 | 0.63 | 0.10   | 14.30 |
| PVX_087885        | 0.23              | 0.04    | 9.77  | 0.40     | 0.06   | 8.81  | 0.56   | 0.08   | 12.98 | 1.77 | 0.26   | 20.00 |
| PVX_082700        | 0.07              | 0.02    | 1.25  | 0.34     | 0.03   | 20.00 | 0.15   | 0.02   | 7.58  | 0.77 | 0.04   | 20.00 |
| PVX_082650        | 0.09              | 0.02    | 6.30  | 0.80     | 0.08   | 15.12 | 1.66   | 0.12   | 20.00 | 3.00 | 0.10   | 20.00 |
| PVX_094255        | 0.32              | 0.04    | 20.00 | 2.89     | 0.59   | 20.00 | 3.39   | 0.69   | 20.00 | 5.10 | 1.11   | 20.00 |
| PVX_097680        | 0.22              | 0.02    | 8.88  | 0.19     | 0.03   | 3.45  | 0.20   | 0.03   | 3.24  | 0.38 | 0.06   | 10.20 |
| PVX_097625        | 0.12              | 0.02    | 3.98  | 0.19     | 0.02   | 3.84  | 0.07   | 0.02   | 1.80  | 0.19 | 0.02   | 7.91  |
| PVX_082670        | 0.07              | 0.02    | 1.57  | 0.16     | 0.03   | 2.54  | 0.25   | 0.03   | 6.38  | 0.27 | 0.02   | 12.50 |
| PVX_082735        | 0.13              | 0.02    | 2.02  | 0.15     | 0.02   | 5.09  | 0.12   | 0.02   | 3.60  | 0.39 | 0.03   | 20.00 |
| PVX_121897        | 2.56              | 0.39    | 20.00 | 0.32     | 0.04   | 6.05  | 0.24   | 0.03   | 7.92  | 0.59 | 0.06   | 12.91 |
| PVX_090330        | 0.23              | 0.04    | 9.40  | 0.29     | 0.06   | 3.37  | 0.22   | 0.03   | 4.87  | 0.36 | 0.07   | 5.75  |
| PVX_123685        | 0.28              | 0.04    | 9.04  | 0.33     | 0.06   | 4.17  | 0.36   | 0.05   | 5.96  | 0.88 | 0.11   | 17.22 |
| PVX_097720        | 0.10              | 0.02    | 2.66  | 0.14     | 0.02   | 2.89  | 0.17   | 0.02   | 3.22  | 0.38 | 0.02   | 11.58 |
| PVX_000930        | 0.08              | 0.02    | 3.68  | 0.15     | 0.02   | 4.44  | 0.20   | 0.02   | 7.20  | 0.50 | 0.03   | 18.08 |
| PVX_090240        | 1.02              | 0.20    | 20.00 | 2.12     | 0.49   | 20.00 | 1.38   | 0.09   | 20.00 | 1.30 | 0.06   | 20.00 |
| PVX_110810A       | 0.12              | 0.02    | 10.19 | 0.17     | 0.02   | 7.78  | 0.44   | 0.03   | 20.00 | 0.98 | 0.04   | 20.00 |
| AAY34130.1        | 0.06              | 0.02    | 4.42  | 0.13     | 0.02   | 4.16  | 0.28   | 0.02   | 20.00 | 0.70 | 0.04   | 20.00 |
| KMZ83376.1        | 0.11              | 0.02    | 7.47  | 0.44     | 0.02   | 17.25 | 0.29   | 0.02   | 20.00 | 2.17 | 0.22   | 20.00 |
| PVX_095055        | 0.16              | 0.02    | 12.30 | 0.27     | 0.02   | 15.81 | 0.42   | 0.03   | 13.40 | 0.99 | 0.05   | 20.00 |
| PVX_098585        | 0.62              | 0.08    | 17.12 | 0.60     | 0.08   | 14.58 | 0.80   | 0.09   | 20.00 | 1.74 | 0.21   | 20.00 |
| PVX_121920        | 0.49              | 0.09    | 20.00 | 0.53     | 0.09   | 18.89 | 1.12   | 0.16   | 20.00 | 3.64 | 0.46   | 20.00 |
| PVX_094255B       | 0.08              | 0.02    | 6.65  | 0.28     | 0.02   | 12.24 | 0.40   | 0.02   | 18.75 | 1.96 | 0.06   | 20.00 |
| PVX_087885A       | 0.07              | 0.02    | 1.76  | 0.59     | 0.07   | 5.96  | 2.15   | 0.36   | 20.00 | 0.95 | 0.11   | 17.62 |
| PVX_092995        | 0.33              | 0.04    | 10.12 | 0.18     | 0.02   | 4.15  | 1.51   | 0.22   | 20.00 | 0.42 | 0.03   | 9.20  |

Abbreviations: GMT = Geometric mean titer; 95% CI = 95% confidence interval. \*IgG levels multiplied by 1000. Values are in relative antibody units interpolated from standard curves using a 5PL logistic regression model.

**Table VII. Correlation between antibody titers and age.**

| Antibody response | Thailand       |         | Brazil         |         | Peru           |         |
|-------------------|----------------|---------|----------------|---------|----------------|---------|
|                   | Spearman's rho | p value | Spearman's rho | p value | Spearman's rho | p value |
| PVX_099980        | 0.249          | ****    | 0.343          | ****    | 0.218          | ****    |
| PVX_096995        | 0.231          | ****    | 0.343          | ****    | 0.428          | ****    |
| PVX_101530        | 0.113          | **      | 0.126          | ***     | 0.285          | ****    |
| PVX_097715        | 0.218          | ****    | 0.315          | ****    | 0.290          | ****    |
| PVX_094830        | 0.424          | ****    | 0.152          | ****    | 0.306          | ****    |
| PVX_112670        | 0.297          | ****    | 0.228          | ****    | 0.283          | ****    |
| PVX_090970        | 0.050          | n.s     | 0.190          | ****    | 0.229          | ****    |
| PVX_084720        | 0.124          | ***     | 0.104          | **      | 0.228          | ****    |
| PVX_003770        | 0.462          | ****    | 0.273          | ****    | 0.422          | ****    |
| PVX_092990        | 0.013          | n.s     | 0.146          | ****    | 0.210          | ****    |
| PVX_091710        | 0.128          | ***     | 0.202          | ****    | 0.229          | ****    |
| PVX_087885        | 0.236          | ****    | 0.240          | ****    | 0.248          | ****    |
| PVX_082700        | 0.386          | ****    | 0.300          | ****    | 0.331          | ****    |
| PVX_082650        | 0.494          | ****    | 0.118          | ***     | 0.482          | ****    |
| PVX_094255        | 0.361          | ****    | 0.301          | ****    | 0.380          | ****    |
| PVX_097680        | 0.124          | ***     | 0.284          | ****    | 0.347          | ****    |
| PVX_097625        | 0.311          | ****    | 0.302          | ****    | 0.228          | ****    |
| PVX_082670        | 0.477          | ****    | 0.310          | ****    | 0.391          | ****    |
| PVX_082735        | 0.342          | ****    | 0.371          | ****    | 0.336          | ****    |
| PVX_121897        | -0.103         | **      | 0.019          | n.s     | 0.143          | ***     |
| PVX_090330        | 0.124          | ***     | 0.263          | ****    | 0.330          | ****    |
| PVX_123685        | 0.240          | ****    | 0.235          | ****    | 0.203          | ****    |
| PVX_097720        | 0.363          | ****    | 0.285          | ****    | 0.408          | ****    |
| PVX_000930        | 0.356          | ****    | 0.347          | ****    | 0.281          | ****    |
| PVX_092995        | 0.292          | ****    | 0.132          | ****    | 0.200          | ****    |
| PVX_087885A       | 0.390          | ****    | 0.173          | ****    | 0.293          | ****    |
| PVX_121920        | 0.202          | ****    | 0.333          | ****    | 0.362          | ****    |
| PVX_094255B       | 0.590          | ****    | 0.368          | ****    | 0.436          | ****    |
| PVX_095055        | 0.350          | ****    | 0.319          | ****    | 0.270          | ****    |
| PVX_090240        | 0.479          | ****    | 0.003          | n.s     | 0.498          | ****    |
| AAY34130.1        | 0.296          | ****    | 0.391          | ****    | 0.314          | ****    |
| KMZ83376.1        | 0.615          | ****    | 0.359          | ****    | 0.466          | ****    |
| PVX_098585        | 0.292          | ****    | 0.353          | ****    | 0.397          | ****    |
| PVX_110810A       | 0.248          | ****    | 0.381          | ****    | 0.300          | ****    |

Abbreviations: n.s : not significant, \*\*: p <0.01, \*\*\* : p <0.001, \*\*\*\* : p <0.0001

**Table VIII. Overall antibody response and time since previous infection.**

| Site              | 1 month |            | 1 - 9 month |            | 9 - 13 month |            | No infection |        |       | <i>p</i><br>value |
|-------------------|---------|------------|-------------|------------|--------------|------------|--------------|--------|-------|-------------------|
|                   | GMT*    | 95% CI*    | GMT         | 95% CI     | GMT          | 95% CI     | GMT          | 95% CI |       |                   |
| Negative controls |         |            |             |            |              |            | 0.25         | 0.02   | 15.89 |                   |
| Thailand          | 1.40    | 0.05 20.00 | 1.02        | 0.05 20.00 | 0.59         | 0.04 15.57 | 0.38         | 0.03   | 11.64 | <0.001            |
| Brazil            | 1.49    | 0.06 20.00 | 0.95        | 0.04 20.00 | 0.69         | 0.03 20.00 | 0.45         | 0.02   | 20.00 | <0.001            |
| Peru              | 1.50    | 0.05 20.00 | 1.14        | 0.05 20.00 | 0.87         | 0.04 20.00 | 0.69         | 0.04   | 20.00 | <0.001            |

Abbreviations: GMT = Geometric mean titer; 95% CI = 95% confidence interval. \* Data of relative antibody titers interpolated from standard curves were geometric mean with 95% confidence interval (CI). IgG levels were multiplied by 1000. Participants were categorized according to the time since last qPCR detection in the last year. Kruskal-Wallis test by ranks was used for analysing the variance among groups.

**Table IX. Overall antibody response and number of detected blood- stage infections.**

| Site              | No infection |         |       | 1 infection |           |       | 2 infections |        |       | > 2 infections |        |       | <i>p</i><br>value |
|-------------------|--------------|---------|-------|-------------|-----------|-------|--------------|--------|-------|----------------|--------|-------|-------------------|
|                   | GMT*         | 95% CI* |       | GMT         | 95% range |       | GMT          | 95% CI |       | GMT            | 95% CI |       |                   |
| Negative controls | 0.25         | 0.02    | 15.89 |             |           |       |              |        |       |                |        |       |                   |
| Thailand          | 0.38         | 0.03    | 11.64 | 0.71        | 0.04      | 19.46 | 0.96         | 0.06   | 20.00 | 0.38           | 0.03   | 11.64 | <0.001            |
| Brazil            | 0.45         | 0.02    | 20.00 | 0.86        | 0.03      | 20.00 | 0.99         | 0.04   | 20.00 | 1.09           | 0.05   | 20.00 | <0.001            |
| Peru              | 0.69         | 0.04    | 20.00 | 1.30        | 0.07      | 20.00 | 1.24         | 0.05   | 20.00 | 1.98           | 0.09   | 20.00 | <0.001            |

Abbreviations: GMT = Geometric mean titer; 95% CI = 95% confidence interval. \* Data of relative antibody titers interpolated from standard curves were geometric mean with 95% confidence interval (CI). IgG levels were multiplied by 1000. Participants were categorized according to their number of qPCR detection in the last year. Kruskal-Wallis test by ranks was used for analysing the variance among groups.
